# Supplementary material for: Effect of Exogenous Melatonin Application on the Grain Yield and Antioxidant Capacity in Aromatic Rice under Combined Lead–Cadmium Stress
Source: Antioxidants (Basel). 2022 Apr 13;11(4):776. doi: 10.3390/antiox11040776 (PMC9028010; doi:10.3390/antiox11040776)
Supplement: Supplementary file 1 [file antioxidants-11-00776-s001.zip › Supplementary Table S1.xlsx]

## Sheet: Sheet1
Supplementary Table S1. Metabolites detected in the rice varieties.
				XCK		XS50		YCK		YS50
Index	Formula	Compounds	Class	Avg	SD	Avg	SD	Avg	SD	Avg	SD
pme3033	C4H9NO2	N,N-Dimethylglycine	Amino acids and derivatives	227700	17734.6	252667	11757.9	259963	30178.7	237397	8972.41
pme3017	C4H9NO2	2-Aminoisobutyric acid	Amino acids and derivatives	1.71257e+06	94872.4	1981700	113440	1784300	31413.4	1.94163e+06	63223
pme0010	C3H7NO3	L-Serine	Amino acids and derivatives	317473	46307.8	317270	98600.6	377063	10566.6	323050	14890.1
pme2122	C5H9N3	Histamine	Amino acids and derivatives	22523.3	1419.31	29159	6806.96	24726.3	3894.38	26039.3	4127.53
pme0006	C5H9NO2	L-Proline	Amino acids and derivatives	3.69123e+06	382150	1.0675e+07	5.93237e+06	3.29387e+06	112407	4.35587e+06	365176
pme3193	C4H7NO3	N-Acetyl-L-glycine	Amino acids and derivatives	12618.3	2156.22	13913.7	2250.48	12377	1370.97	14226.7	1650.32
pme0066	C3H7N3O2	Guanidinoacetate	Amino acids and derivatives	9404.97	1485.55	17315.7	4308.6	10500.1	1229.38	15170.7	1643.98
mws0256	C5H11NO2	L-Valine	Amino acids and derivatives	15680000	959767	22277000	9.71604e+06	19154000	686272	1.32127e+07	872807
pme0120	C5H11NO2	5-Aminovaleric acid	Amino acids and derivatives	9676.57	1631.94	23415.7	6098.67	33145	4095.32	39513.3	9804.81
mws0230	C4H9NO3	L-Threonine*	Amino acids and derivatives	549883	49340.4	681133	230875	719007	5078.08	408600	18970.3
pme0195	C3H7NO2S	L-Cysteine	Amino acids and derivatives	9731.27	305.196	8826.27	2146.38	10732.2	1100.56	8863.43	2166.33
mws0263	C5H7NO3	5-Oxo-L-Proline	Amino acids and derivatives	9590.63	2866.3	18345.3	8916.49	6816.6	321.409	7803.67	2405.04
Rfmb319	C6H11NO2	Pipecolic acid	Amino acids and derivatives	315753	43373.8	291973	126980	407817	17691.3	483943	92428.3
mws0216	C5H9NO3	Trans-4-Hydroxy-L-proline	Amino acids and derivatives	29602	2166.14	39349	12246.1	33328.7	3667.56	31911.7	888.885
mws0258	C6H13NO2	L-Isoleucine*	Amino acids and derivatives	1.33567e+07	1.31943e+06	1.68477e+07	5.46009e+06	1.75273e+07	273423	1.22237e+07	1.10869e+06
mws0227	C6H13NO2	L-Leucine*	Amino acids and derivatives	1.30327e+07	1.23418e+06	1.68585e+07	5.60418e+06	1.70137e+07	435716	11943000	1.0504e+06
mws0001	C4H8N2O3	L-Asparagine	Amino acids and derivatives	8377.4	1793.34	54033.6	47269.2	8519.9	414.776	6565.73	535.523
pme2527	C5H12N2O2	L-Ornithine	Amino acids and derivatives	14605.4	6212.55	12680.3	2522.45	8888.53	1136.29	5735.27	527.218
mws0219	C4H7NO4	L-Aspartic Acid	Amino acids and derivatives	2.18123e+06	302517	1.52317e+06	366724	1.52243e+06	71084.7	1.40677e+06	64416.9
pme1002	C8H11NO	L-Tyramine	Amino acids and derivatives	1.69043e+06	48681.5	2.03547e+06	59117.5	1.79083e+06	12679.8	1.51437e+06	184788
Rfmb320	C7H13NO2	1-Methylpiperidine-2-carboxylic acid	Amino acids and derivatives	420407	5728.21	414227	57693.2	415207	26078.5	436723	66604.4
Rfmb318	C7H14NO2+	D-Proline betaine	Amino acids and derivatives	196197	10719.6	174593	28034.3	189447	4781.44	194517	23506.9
pme0193	C5H10N2O3	L-Glutamine	Amino acids and derivatives	566207	88498.7	3.89865e+06	2.95239e+06	516733	45543.1	947407	42892.9
pme0026	C6H14N2O2	L-Lysine	Amino acids and derivatives	552173	91405	3.81858e+06	2.9225e+06	504417	41202	933250	40964.6
Zmzn000113	C5H9NO4	L-threo-3-Methylaspartate	Amino acids and derivatives	1.89117e+06	328480	1.57113e+06	219693	1.95663e+06	99196.2	1858600	145491
pme0014	C5H9NO4	L-Glutamic acid	Amino acids and derivatives	19692000	1.35496e+06	1.55847e+07	1.42685e+06	2.11287e+07	313083	1.97437e+07	1.95471e+06
pme1210	C5H11NO2S	L-Methionine	Amino acids and derivatives	348840	41366.4	1.84421e+06	1.08267e+06	241273	6379.51	343687	2392.81
mws0254	C6H9N3O2	L-Histidine	Amino acids and derivatives	148379	33641.6	879420	585587	125237	12074.3	232897	10410.8
pme0128	C6H12N2O3	L-Alanyl-L-Alanine	Amino acids and derivatives	11467.6	3675.43	29745	5451.06	15485.7	1510.3	48023.7	3472.03
pme3382	C6H11NO4	N-Acetyl-L-threonine	Amino acids and derivatives	111738	11700.5	64655.3	6044.97	59717.3	5826.04	42924	8812.66
pme1419	C6H13NO2S	L-Methionine methyl ester	Amino acids and derivatives	26014	313.967	33134.7	9883.66	20785	1001.52	21618	1040.78
pme2617	C5H11NO3S	L-Methionine Sulfoxide	Amino acids and derivatives	588193	62508.7	644333	62214	603943	44225.4	732713	65488.6
pme0021	C9H11NO2	L-Phenylalanine	Amino acids and derivatives	3029000	307276	4.46827e+06	1.57066e+06	2.68593e+06	90521.5	2.53677e+06	254927
pme0181	C7H11N3O2	3-Methyl-L-Histidine	Amino acids and derivatives	28867.3	4195.25	27210.7	4809.88	26056	2317.79	34686	1883.8
pme0124	C7H12N2O3	L-Glycyl-L-proline	Amino acids and derivatives	8153	1253.06	27634.6	20818.7	3370.9	788.741	7531.17	733.226
pme0253	C8H15NO3	N-Acetyl-L-leucine	Amino acids and derivatives	16302.7	896.226	19077.3	2619.8	15692.3	836.953	13350.3	845.505
mws0260	C6H14N4O2	L-Arginine	Amino acids and derivatives	51048.7	4718.24	483823	426389	50823	2080	57371.3	2131.26
pme2559	C6H9NO5	N-Acetyl-L-Aspartic Acid	Amino acids and derivatives	113305	11366	117703	16227.5	101163	4726.88	113756	18405.7
pme0008	C6H13N3O3	L-Citrulline	Amino acids and derivatives	16600.2	3563.61	14979	8970.52	17505.3	1542.74	5965.3	1657.63
mws0875	C5H10N2O3S	L-Cysteinyl-L-glycine	Amino acids and derivatives	1813.02	860.566	2171.7	716.508	2722.83	937.574	2447.54	913.773
mws0250	C9H11NO3	L-Tyrosine	Amino acids and derivatives	6.01443e+06	267494	1.42877e+07	9.31632e+06	4.92433e+06	92782	5.22147e+06	625773
pme0137	C7H12N2O4	N-Acetyl-L-Glutamine	Amino acids and derivatives	181960	8920.03	291573	46480.4	396773	5074.93	491557	53389.7
mws0736	C8H16N2O3	N-Glycyl-L-leucine	Amino acids and derivatives	41838.3	4304.54	566302	522753	27866.7	2857.05	34975.3	1803.69
pme0122	C8H16N2O3	N6-Acetyl-L-lysine	Amino acids and derivatives	26844.3	3338.35	292636	261424	34342.3	4799.4	42077	2655.56
Zmjp000182	C7H16N4O2	N-Monomethyl-L-arginine	Amino acids and derivatives	5921.87	657.687	19375.6	9979.31	4930.6	370.77	7327.9	426.15
pme0075	C7H11NO5	N-Acetyl-L-glutamic acid	Amino acids and derivatives	207637	30835	215157	96049.9	214610	22520.9	138926	23591
pme0278	C7H14N2O4	2,6-Diaminooimelic acid	Amino acids and derivatives	5765.93	757.344	7869.63	3384.38	7938.23	1043.57	7248.93	1737.23
pme3827	C9H11NO4	3,4-Dihydroxy-L-phenylalanine	Amino acids and derivatives	81522.3	6451.82	70555.3	12246.8	55892.7	8644.13	62589.7	6562.51
mws5037	C9H18N2O3	L-Alanyl-L-leucine	Amino acids and derivatives	46580	5714.9	49356	10042.1	54693.3	1442.41	55589.7	6597.61
NK10251888	C8H18N4O2	NG,NG-Dimethyl-L-arginine	Amino acids and derivatives	5850.2	805.687	47707.3	42198.8	4719.77	258.139	7965.4	476.285
mws0282	C11H12N2O2	L-Tryptophan	Amino acids and derivatives	3.00493e+06	110101	7.37013e+06	4.13029e+06	2.67983e+06	15028.2	2.64207e+06	670330
Zmgn002106	C11H13NO3	N-Acetyl-L-phenylalanine	Amino acids and derivatives	39582.3	2426.23	44256	107.531	52779.3	5671.53	71664.7	9977.19
pme0170	C8H16N4O3	N-Acetyl-L-Arginine	Amino acids and derivatives	60746	1667.88	67191	997.459	67782.3	737.164	90254.7	5539
pme2566	C8H14N2O5	(5-L-Glutamyl)-L-amino acid	Amino acids and derivatives	947697	22651.2	2.10053e+06	187615	7383600	634771	8.23807e+06	258703
pme1228	C11H12N2O3	5-Hydroxy-L-tryptophan	Amino acids and derivatives	53141	4498.21	68935.3	17437.6	47778.3	3805.67	49298.3	5611.88
mws5042	C11H14N2O3	L-Glycyl-L-phenylalanine	Amino acids and derivatives	26264.3	3835.68	251978	227277	20580.7	2813.91	17389	1238.65
mws0520	C11H13NO4	N-Acetyl-L-tyrosine	Amino acids and derivatives	54562.3	6854.24	31602.7	4273	32736.3	2229.83	23139	1946.54
Lmhp001461	C11H20N2O3	L-Prolyl-L-Leucine	Amino acids and derivatives	20159.7	4443.71	259464	245670	9275.23	2427.44	7996.43	1357.71
Lmhp001670	C11H22N2O3	L-Valyl-L-Leucine	Amino acids and derivatives	14484.8	2336.51	42331.7	2904.23	34241.3	1880.07	47810.3	3902.92
pmb0962	C10H22N2O4	L-Lysine-Butanoic Acid	Amino acids and derivatives	3307.17	539.94	20468.6	16468.9	2770.93	581.002	5119.5	731.643
mws4176	C12H16N2O3	L-Alanyl-L-Phenylalanine	Amino acids and derivatives	6942.83	1255.21	67118.2	60770.9	7497.9	1223.21	5294.2	965.442
mws0221	C6H12N2O4S2	L-Cystine	Amino acids and derivatives	2158.02	867.159	3611.57	1630.51	7754.23	1428.3	5731.23	1267.54
pmb2591	C13H14N2O3	N-Acetyl-L-Tryptophan	Amino acids and derivatives	9938.13	460.241	18461.7	2336.07	18079.7	2533.8	33200	9351.87
Lmrj002087	C10H18N2O5	L-Isoleucyl-L-Aspartate	Amino acids and derivatives	18188	3496.42	168492	157174	9527.23	696.32	9054.2	813.502
pme2563	C8H14N2O5S	γ-Glu-Cys	Amino acids and derivatives	30351.3	1629.99	34635	2362.79	13957	1967.23	37091.3	3612.19
Lmhp001732	C14H18N2O3	L-Prolyl-L-Phenylalanine	Amino acids and derivatives	7046.87	717.745	134703	128151	3371.53	1718.77	12213	727.974
Lmhp002001	C14H20N2O3	L-Valyl-L-Phenylalanine	Amino acids and derivatives	13311.4	3019.47	93032.3	81899.2	12023.5	3328.52	11311.3	1469.69
pme2890	C8H16N2O4S2	L-Homocystine	Amino acids and derivatives	2500.91	2121.35	18048.4	11824.8	3746.53	787.678	2044.27	923.953
pme1712	C11H20N2O6	L-Saccharopine	Amino acids and derivatives	38095	3016.2	40418.7	1522.33	44180.3	2472.13	67992.7	6087.09
mws5035	C15H22N2O3	L-Leucyl-L-phenylalanine	Amino acids and derivatives	26865	5036.94	90054	68047.1	28673	6974.92	20380.7	2289.69
mws0629	C13H16N2O5	L-Aspartyl-L-Phenylalanine	Amino acids and derivatives	8001.67	1510.27	41402.1	36900.4	3562.53	367.024	3533.57	228.458
pme1086	C10H17N3O6S	Glutathione reduced form	Amino acids and derivatives	262643	28112.6	407230	37931.5	229493	53407.5	366097	38262.9
pmb2857	C11H19NO9	L-Glutamic acid-O-glycoside	Amino acids and derivatives	18410	3388.81	45349.7	13509	31667.3	2367.65	37155.7	3691.3
mws0636	C18H20N2O3	L-Phenylalanyl-L-phenylalanine	Amino acids and derivatives	2766.43	636.408	8312.93	6290.61	2524.87	508.687	1895.63	96.2555
mws0582	C11H19N3O6S	S-(Methyl)glutathione	Amino acids and derivatives	9	0	659990	129906	33686.7	9264.73	705387	195863
pme1286	C14H20N6O5S	S-(5'-Adenosy)-L-homocysteine	Amino acids and derivatives	28255.3	2358.24	36982	8955.83	19724	1647.54	20730.3	987.47
pme2735	C15H22N6O5S	S-Adenosyl-L-methionine	Amino acids and derivatives	28355.7	1580.71	25804	4239.08	22522.3	4384.71	27498	1833.91
pmb0464	C16H27NO14	L-Aspartic acid-O-diglucoside	Amino acids and derivatives	1.11887e+06	32889.5	2690400	1.40988e+06	1.03187e+06	7356.03	1094000	71248.6
mws4134	C20H32N6O12S2	Oxiglutatione	Amino acids and derivatives	354137	33250.3	328217	40025.2	254803	27994.3	132780	12803
mws0752	C11H22O2	Undecylic Acid	Lipids	439983	25716	469203	84302.8	445120	5097.57	432977	35642
Zmjn003398	C12H20O4	2-Dodecenedioic acid	Lipids	20380	4935.42	14259	1485.43	10712.2	4185.24	6848.93	642.427
mws0119	C14H28O2	Myristic Acid	Lipids	2.39097e+07	2.03289e+06	2.24883e+07	2.70465e+06	20412000	1.28645e+06	1.79923e+07	183312
mws0359	C15H30O2	Pentadecanoic Acid	Lipids	559873	101199	539930	112621	443913	33718.1	385267	19793.5
Hmbp003234	C12H14O6	1-O-Caffeoylglycerol	Lipids	41207	3074.22	39718.3	2633.01	56707.3	5185.93	89463.7	9282.26
mws0361	C16H30O2	Palmitoleic Acid	Lipids	8605.57	3674.86	14606.6	8644.1	5688.83	1463.88	5995.07	118.849
mws0120	C8H20NO6P	Choline Alfoscerate	Lipids	117783	9167.59	471907	314721	152337	21831	275380	79744.7
Hmsn000210	C17H30O2	Methyl 7,10-hexadecadienoate	Lipids	2.45793e+06	127456	1.83693e+06	137721	2175900	113871	1.83793e+06	103415
mws0383	C17H32O2	Cis-10-Heptadecenoic Acid	Lipids	580973	166546	4.59808e+06	4.17898e+06	534793	57016.6	440017	9622.2
mws0362	C17H34O2	Heptadecanoic acid	Lipids	166307	26747.2	162937	7210.48	74209	10115.6	77686	18847.3
pmf0293	C18H38O	1-Octadecanol	Lipids	129043	1770.03	127530	3766.68	142407	2371.09	144357	4780.33
pmp001264	C16H35NO2	Hexadecylsphingosine	Lipids	1.64257e+06	47899.9	1.69177e+06	56512.8	1909200	96745.6	1.55563e+06	67281.1
pmb1574	C18H28O2	9,12-Octadecadien-6-Ynoic Acid	Lipids	6606.03	1084.53	5920.83	465.408	8700.67	2121.39	5700.67	1246.53
pmb0889	C18H30O2	Punicic acid (9Z,11E,13Z-octadecatrienoic acid)	Lipids	73933.7	4028.97	77730.3	13669.7	95983	14943	72610	7324.56
mws0367	C18H30O2	α-Linolenic Acid*	Lipids	1.56493e+07	1.19338e+06	1.85163e+07	4.30104e+06	1.71443e+07	1.1899e+06	1.39213e+07	821376
Lmbn005923	C18H30O2	Crepenynic acid	Lipids	401643	31686.4	568743	183970	453840	31905	361410	16505.3
mws0366	C18H30O2	γ-Linolenic Acid*	Lipids	1.55063e+07	1.0201e+06	1.90457e+07	4.56213e+06	16986000	1.33074e+06	1.42433e+07	689482
Lmbn006152	C18H32O2	(9Z,11E)-Octadecadienoic acid	Lipids	28190.3	1201.11	72414.3	48628.1	29471.7	217.251	25645.7	1868.72
mws1491	C18H32O2	Linoleic acid	Lipids	9005300	325444	2.1698e+07	1.37642e+07	9.79623e+06	262070	8.31973e+06	327500
YC512118	C18H35NO	Oleamide (9-Octadecenamide)	Lipids	56409.7	11530.1	63491.3	14968.4	57251.7	11119.6	58951.7	11995.6
mws2623	C18H34O2	11-Octadecanoic acid(Vaccenic acid)	Lipids	4.69813e+06	550591	2.39352e+07	2.01322e+07	4.82143e+06	360173	5.31313e+06	1.56517e+06
mws1489	C18H36O2	Stearic Acid	Lipids	3.90483e+07	1.15527e+06	30991000	1.13365e+06	3.31293e+07	564958	3.11877e+07	506128
pmb0885	C18H26O3	4-Oxo-9Z,11Z,13E,15E-Octadecatetraenoic Acid	Lipids	25462.7	1610.73	22840.3	2238.41	28073.7	1388.51	25769	770.309
pmb2792	C18H30O3	13-Hydroxy-6,9,11-octadecatrienoic acid	Lipids	22384	1487.92	21769.7	660.943	21224.7	72.3425	22300.7	1112.6
pmb2787	C18H30O3	9-Oxo-10E,12Z-octadecadienoic acid	Lipids	13296	380.384	14943.7	2455.46	13568.7	1236.55	9940.5	985.159
Lmbn005369	C18H32O3	13(S)-HODE;13(S)-Hydroxyoctadeca-9Z,11E-dienoic acid*	Lipids	85833.7	6779.42	102565	30539.3	114206	16566.3	80459.3	7798.79
Rfmb091	C18H32O3	9S-Hydroxy-10E,12Z-octadecadienoic acid*	Lipids	88625.3	6047.58	108276	32254.7	121531	17263.5	84303	8039.78
Zmyn004714	C18H34O3	Ricinoleic acid	Lipids	39318	2565.66	42054.7	2731.06	37314	630.762	39562	1296.11
pmf0297	C20H42O	1-Eicosanol	Lipids	32725.3	2252.34	37958.3	2054.22	32821.3	626.046	34264	871.727
Lmqn008288	C18H36O3	3-Hydroxyoctadecanoic Acid	Lipids	546433	74851	534763	32841.3	662217	42927	482467	40675.4
pmn001610	C20H36O2	Eicosadienoic acid	Lipids	110781	7388.91	708390	595259	125190	7377.54	120033	5261.79
pmn001606	C20H38O2	Eicosenoic acid	Lipids	30006	5835.94	23077.7	395.244	31277.7	3669.3	13603	1817.29
Lmbn005287	C18H32O4	7S,8S-DiHODE; (9Z,12Z)-(7S,8S)-Dihydroxyoctadeca-9,12-dienoic acid	Lipids	12824.7	1498.11	20640.3	6356.79	12205	1133.97	10770.5	1554.02
Lmbn005487	C18H34O4	12,13-DHOME; (9Z)-12,13-Dihydroxyoctadec-9-enoic acid	Lipids	32545.7	1954.61	38251	11447.3	25723.7	2265.49	25329	2145.29
pmn001694	C18H34O5	9,10,13-Trihydroxy-11-Octadecenoic Acid	Lipids	30105.3	3497.85	28365.3	3141.18	48806	22379.4	23706	4452.32
pmp001284	C19H38O4	Monopalmitin	Lipids	13515	1573.82	12892.7	1404.77	11154.1	663.674	11652.9	1327.81
mws0967	C20H32O5	5,6,15-Trihydroxy-7,9,11,13-eicosatetraenoic acid	Lipids	8774.83	655.665	7466	1650.89	2684.43	50.9432	1314.67	309.405
Lmhp011562	C21H36O4	1-α-Linolenoyl-glycerol	Lipids	847337	82028.4	786900	53027.4	778600	112093	695160	99753.1
Lmhp112042	C21H38O4	1-Linoleoylglycerol	Lipids	82276.7	3795.14	139254	70236.4	65545.7	6848.61	73646	5853.47
pmb0296	C21H40O4	1-Oleoyl-Sn-Glycerol	Lipids	68415.7	10450	97972.7	32605	198450	7383.68	280750	1177.58
Cmbp005948	C21H20O8	1-O-p-Hydroxycinnamoyl-3-O-caffeoylglycerol	Lipids	23234.7	1304.06	24996.7	2476.61	19897.7	1854.71	23586.7	1585.45
pmb0864	C19H40NO7P	LysoPE 14:0	Lipids	2788.07	592.246	11111.3	3930.95	2801.23	43.6509	2895.13	1189.92
Cmbn007148	C22H22O9	1-O-Feruloyl-3-O-caffeoylglycerol	Lipids	55658.7	16768.8	33341	12887.4	20250	2480.86	31850.7	8981.29
pmb0862	C20H42NO7P	LysoPC 12:0	Lipids	1803.57	125.247	3863.7	1004.73	1626.53	226.667	1788.1	124.307
Lmhp009187	C20H42NO7P	LysoPE 15:0	Lipids	8715.13	2736.78	20972	1143.23	8124.1	1424.77	8983.7	2864.23
pmb0876	C21H44NO7P	LysoPE 16:0	Lipids	262643	62388	1.11299e+06	510469	221377	23919.9	217472	87401.3
pmd0130	C22H46NO7P	LysoPC 14:0	Lipids	4981.6	1134.74	57971.7	54545.6	8619.7	3692.67	5044.53	389.089
Lmhp008801	C23H42NO7P	LysoPE 18:3	Lipids	74828	14935.7	294947	130972	73416.3	5964.28	57553.3	16827.5
pmb0881	C23H44NO7P	LysoPE 18:2	Lipids	74778.7	16994.1	872253	707828	67844.3	6594.98	65426.7	23367.2
pmb2260	C23H46NO7P	LysoPC 15:1	Lipids	6538.17	1096.98	8864.33	4479.25	8633.33	1022.52	11819.6	3216.36
mws0289	C23H46NO7P	LysoPE 18:1	Lipids	11682.7	3251.91	732884	706108	11760.8	1593.93	10271.9	1714.48
pmb2319	C23H48NO7P	LysoPC 15:0	Lipids	16000.4	3268.5	155903	131549	22515.7	4846.89	21803.7	2833.03
pmb0883	C23H48NO7P	LysoPE 18:0	Lipids	3103.27	870.517	1.32431e+06	1.31824e+06	3175.37	339.215	1953.07	478.049
pma1303	C24H46NO7P	LysoPC 16:2	Lipids	2118.4	177.559	16009.6	11750.2	2477.83	912.762	2992.47	523.129
pmp001270	C24H48NO7P	LysoPC 16:1	Lipids	22032.7	3522.09	1.3636e+06	1.32395e+06	34484.3	11209	15215	3137.12
pmb0855	C24H50NO7P	LysoPC 16:0	Lipids	4.69427e+06	578706	17300500	7.03445e+06	6.11547e+06	1.18677e+06	5523100	1.08567e+06
Lmhp008718	C25H48NO7P	LysoPC 17:2	Lipids	9852.93	620.023	200073	182794	20925.3	3013.61	18389.3	2781.64
Lmhp009590	C25H50NO7P	LysoPC 17:1	Lipids	24162.3	1506.28	910908	866899	66565.7	8423.41	43170.7	4966.52
pmb2406	C25H52NO7P	LysoPC 17:0	Lipids	7509.17	1289.44	1147229	1.13424e+06	9759.07	799.821	6021	922.201
Lmhp009773	C27H46O9	1-α-Linolenoyl-glycerol-3-O-glucoside	Lipids	96631.3	21580.5	100276	15467.3	117712	21943.7	120414	11663.2
Hmqp006235	C21H46N3O9P	LysoPC 18:4	Lipids	2669.2	425.97	54632.6	50129.6	3921.53	586.958	3410.2	594.39
Lmhp010573	C27H48O9	1-Linoleoylglycerol-3-O-glucoside	Lipids	4086.6	186.043	3678.6	478.567	6259.4	1159.84	9117.57	1396.78
pmb0854	C26H48NO7P	LysoPC 18:3	Lipids	1.15573e+06	90938.9	2595100	278048	1.52193e+06	250981	1212750	143954
pmp001273	C26H50NO7P	LysoPC 18:2	Lipids	1250900	140061	4.60103e+06	2.10493e+06	1529300	252544	1506480	333876
pmp001281	C26H52NO7P	LysoPC 18:1	Lipids	148387	15673.9	2101710	1.80738e+06	183423	14471.8	165100	25284.9
mws0126	C26H54NO7P	LysoPC 18:0	Lipids	89924.7	12567.9	4616550	4.45573e+06	85026	8549.97	66764	10660.7
Lmhp010908	C27H54NO7P	LysoPC 19:1	Lipids	5453.17	579.613	660811	650045	13292	1729.3	9514.47	1263.84
pmd0147	C28H54NO7P	LysoPC 20:2	Lipids	9	0	305606	302572	2322.73	178.984	9	0
Hmyn007087	C25H49O11P	LysoPI 16:0	Lipids	4297.97	454.834	86983.1	81714.2	4349.97	1120.86	2957.9	545.361
Lmhp008744	C33H56O14	1-α-Linolenoyl-glycerol-2,3-di-O-glucoside	Lipids	33099.7	9090.96	29225.3	9459.12	59883	9633.54	65588	9379.71
pmp001276	C33H56O14	1-Linolenoyl-rac-glycerol-diglucoside	Lipids	869920	58663.7	1061860	180520	1.09158e+06	61734.9	1.01674e+06	64525.9
Lmhp009384	C33H58O14	1-Linoleoylglycerol-2,3-di-O-glucoside	Lipids	5581.67	1557.36	4193.47	611.69	10933.5	1562.71	17710.3	1602.77
mws0255	C4H5N3O	Cytosine	Nucleotides and derivatives	94479	9901.89	291924	181082	98269	983.772	114640	3453.37
pme0257	C4H4N2O2	Uracil	Nucleotides and derivatives	323310	37736.4	468863	50439.4	629527	70508.7	401223	31726
mws0251	C5H6N2O2	Thymine	Nucleotides and derivatives	24611	1605.5	150483	124028	21001.3	5562.03	18956	3945.84
pme0040	C5H5N5	Adenine	Nucleotides and derivatives	429620	34715.7	1.06348e+06	613541	362570	80314.4	415250	52672.2
mws0847	C6H7N5	1-Methyladenine	Nucleotides and derivatives	30228.3	16223.9	93788	58535.6	67731.7	10826.6	95660.7	28453.5
pme1109	C5H5N5O	Guanine	Nucleotides and derivatives	862483	74417.6	1132510	530658	551567	77392.5	451010	95176.4
pmc0274	C6H6N4S	6-Methylmercaptopurine	Nucleotides and derivatives	4.22287e+06	405113	6558000	2.52672e+06	3.88233e+06	141895	3632100	386670
pmb2507	C5H11O7P	2-Deoxyribose-1-phosphate	Nucleotides and derivatives	176977	15515.1	151873	22189.3	209310	22966.3	221353	27788.4
pme1194	C9H13N3O4	2'-Deoxycytidine	Nucleotides and derivatives	19383.7	1336.37	932759	916925	17560.3	744.069	17412.7	1639.45
pme0264	C10H14N2O5	Thymidine	Nucleotides and derivatives	11494.3	672.373	1.94553e+06	1.93619e+06	11848.5	1598.07	11455.8	784.202
pme3732	C9H13N3O5	Cytidine*	Nucleotides and derivatives	249283	57702.4	1472950	1.20332e+06	245260	16692.6	291347	36875.4
ML10180524	C9H13N3O5	Cytarabine*	Nucleotides and derivatives	176167	33081.5	1.24475e+06	1.04609e+06	199860	12130.8	242980	34819.9
mws0248	C9H12N2O6	Uridine	Nucleotides and derivatives	89194	16949.9	351246	268189	119751	28751.7	105384	3163.17
pme3961	C10H13N5O3	2'-Deoxyadenosine	Nucleotides and derivatives	111640	5836.58	1.30082e+07	1.28884e+07	103280	8941.69	94291.3	15202.2
pme1184	C10H13N5O4	2'-Deoxyguanosine	Nucleotides and derivatives	25065.7	5674.09	5.56553e+06	5.54173e+06	25698.3	5612.58	40349.3	18973
pme0230	C10H13N5O4	Adenosine	Nucleotides and derivatives	1.43133e+06	326775	1.52843e+06	218150	1.29713e+06	165489	1072650	146071
pme1178	C10H13N5O5	Guanosine*	Nucleotides and derivatives	1086410	124117	6.52843e+06	5.17423e+06	1.10903e+06	105539	1.29643e+06	114646
Zmyp000878	C10H13N5O5	2-Hydroxyadenosine*	Nucleotides and derivatives	1.52103e+06	184220	9.26497e+06	7.51002e+06	1.56513e+06	198618	1.82323e+06	176909
mws0668	C10H12N4O6	Xanthosine	Nucleotides and derivatives	124097	4625.94	164610	35760.7	126300	10696.2	110557	5282.49
pme1474	C11H15N5O3S	5'-Deoxy-5'-(methylthio)adenosine	Nucleotides and derivatives	5.77013e+06	160256	5.50707e+06	87942.6	4.50137e+06	5900.38	5.28663e+06	397984
pmb0197	C11H15N5O5	N7-Methylguanosine	Nucleotides and derivatives	6652.53	475.37	28946.7	18519.1	6741.33	1174.41	9469.53	1092.45
mws0724	C10H13N5O6	8-Hydroxyguanosine	Nucleotides and derivatives	12241.3	1004.99	10966	1687.32	8985.97	452.684	8718.4	1374.65
pme1373	C9H14N3O7P	2'-Deoxycytidine-5'-monophosphate	Nucleotides and derivatives	5221.8	251.439	6575.43	569.514	3109.6	540.081	4694.73	279.31
pme3967	C12H17N5O5	2-(Dimethylamino)guanosine	Nucleotides and derivatives	89318.7	8333.94	372453	247527	35172.7	3219.44	116883	10677
pme3188	C9H13N2O9P	Uridine 5'-monophosphate	Nucleotides and derivatives	31818	4631.59	52446.7	5576.61	35191.7	8817.19	40491.3	1917.02
mws0884	C10H12N5O6P	Cyclic 3',5'-Adenylic acid	Nucleotides and derivatives	107450	22800.6	124109	22923.4	124537	19224.4	102044	12659.2
pme3184	C10H14N5O6P	2'-Deoxyadenosine-5'-monophosphate	Nucleotides and derivatives	66188	5892.4	81785.7	5657.48	83670.3	8222.37	100486	6632.34
pmc0066	C10H13N4O7P	2'-Deoxyinosine-5'-monophosphate	Nucleotides and derivatives	1.42913e+07	1.8026e+06	1.20473e+07	194526	1.46037e+07	1.50125e+06	1.01892e+07	1.1492e+06
mws0675	C11H15N2O8P	β-Nicotinamide mononucleotide	Nucleotides and derivatives	49089.7	8050.27	26980.7	6500.92	48733	12198.5	21719.3	6192.47
mws0609	C10H12N5O7P	Guanosine 3',5'-cyclic monophosphate	Nucleotides and derivatives	47428.3	4964.41	104331	20369.8	42019.7	10124.4	93855.3	4733.01
pmb0981	C10H14N5O7P	Adenosine 5'-monophosphate	Nucleotides and derivatives	2.92843e+06	516107	3.61503e+06	320689	3252000	113147	2.92843e+06	349679
mws0874	C10H14N5O7P	3'-Adenylic Acid	Nucleotides and derivatives	21949.7	4067.98	27232	3382.04	19087.3	2529.52	19202	3672.29
pmb0998	C10H14N5O8P	Guanosine 5'-monophosphate	Nucleotides and derivatives	59825.7	7709.95	64938.7	9359.55	65897.3	1977.06	45842.7	5688.62
pme3337	C14H17N5O8	Succinyladenosine	Nucleotides and derivatives	945840	61041.7	1995420	929344	955870	18360.2	1.0781e+06	89024.9
pme3007	C9H14N2O12P2	Uridine 5'-diphosphate	Nucleotides and derivatives	5874.27	1459.09	6172.73	1012.83	5717.43	335.117	7492.63	177.529
pme2117	C10H15N5O10P2	Adenosine 5'-diphosphate	Nucleotides and derivatives	145660	10148.3	139763	17860.3	110230	2671.6	148443	4287.15
pmb2922	C15H24N2O17P2	Uridine 5'-diphospho-D-glucose	Nucleotides and derivatives	817743	42313.8	704877	12429.6	790360	16534.5	864513	19871.2
pmb0530	C21H27N7O14P2	Nicotinic acid adenine dinucleotide	Nucleotides and derivatives	330607	26832.7	303360	27720.3	299083	14638.8	333683	29222.5
pme2651	C21H28N7O17P3	NADP (Nicotinamide adenine dinucleotide phosphate)	Nucleotides and derivatives	313667	20590.2	340627	10920.3	280463	21877.9	369033	30309.8
pme2746	C27H33N9O15P2	Riboflavin 5'-Adenosine Diphosphate	Nucleotides and derivatives	307117	17634.9	306647	8792.58	235423	3365.22	242900	9112.85
pme1974	C3H4O3	Pyruvic acid	Organic acids	16865	1577.14	33882	1310.27	17403.7	944.353	19083	2266.92
pme2601	C3H6O3	3-Hydroxypropanoic acid	Organic acids	29311	2905.24	29812.7	1083.6	26801.3	2159.65	22680	777.269
Lmqp000873	C4H4O3	Succinic anhydride	Organic acids	202343	8333.15	225067	43678.8	170593	12392.7	184240	23870.7
mws4052	C4H7NO2	1-Aminocyclopropane-1-carboxylic acid	Organic acids	139480	10190.6	109361	13939.6	166157	5726.05	128810	15334.8
Lmgn000219	C4H6O3	Succinic semialdehyde	Organic acids	42863.3	9195.01	68031.3	5746.54	37360.3	4637.04	49772.7	7931.91
pme3011	C4H9NO2	γ-Aminobutyric acid	Organic acids	175347	16450.1	191433	2695.81	219307	45427.4	186750	2038.11
ML10172161	C3H4O4	Hydroxypyruvic acid*	Organic acids	55918	5286.95	56655	12468	65947.3	1397.62	60948	1090.68
mws0576	C4H8O3	3-Hydroxybutyric acid	Organic acids	270273	3639.19	246440	21955.9	336300	7176.84	271860	5137.32
pme1975	C3H4O4	Malonic acid*	Organic acids	353227	6348.11	308403	17217.7	442177	3467.36	347683	12381.9
mws0601	C5H5NO2	Pyrrole-2-carboxylic acid	Organic acids	7400.4	2024.27	13788.3	2272	8424.67	777.043	8306.2	913.632
mws0177	C5H4O3	2-Furanoic acid	Organic acids	76785.7	8635.55	86060	18928.8	59045	18195.3	78782.3	15878.4
pme0275	C5H7O3-	4-Oxopentanoic Acid	Organic acids	11102.6	1570	10019.9	1499.24	12220.1	1971.8	11529.1	885.067
mws0376	C4H4O4	Fumaric acid	Organic acids	323900	62138.4	211107	23380.4	258920	45382.8	233823	30214
mws0823	C5H8O3	3-Methyl-2-Oxobutanoic acid	Organic acids	71092.3	6198.74	64459.3	6510.51	75253	6406.02	75658	9787.04
mws0192	C4H6O4	Succinic acid	Organic acids	63156000	891465	6.32817e+07	5.85557e+06	5.54887e+07	3.83989e+06	6.29067e+07	2.16263e+06
pme1730	C4H6O4	D-Erythronolactone	Organic acids	279257	11587.1	327640	22923.2	217543	10927.9	289517	50931.9
pme3096	C3H5NO4	Aminomalonic acid	Organic acids	2717200	72091.7	2.74707e+06	284313	2328200	143184	2.62443e+06	82522.4
mws0671	C4H9NO3	L-Homoserine*	Organic acids	545860	33708.9	665443	244905	762337	12557.8	390837	5252.06
pme1216	C6H5NO2	2-Picolinic acid	Organic acids	112013	4258.38	430483	246832	127340	3533.47	266037	9906.85
mws0236	C2H7NO3S	2-Aminoethanesulfonic acid	Organic acids	4550	1264.77	846217	843892	2453.07	874.128	9023.13	4035.17
Zmgn000216	C2H7O4P	2-Hydroxyethylphosphonic acid	Organic acids	695130	8614.21	5.85157e+06	832048	6059300	386217	7719500	2.28013e+06
mws0425	C5H6O4	Citraconic acid	Organic acids	124923	7206.01	141894	27085.4	123292	28649.2	143143	21241.5
Zmpn000638	C4H9N3O2	3-Guanidinopropionic acid	Organic acids	126327	12823.1	171685	67059.7	123210	8698.42	130462	22382.7
pme0274	C6H13NO2	6-Aminocaproic acid	Organic acids	512030	84082.1	1192310	745096	650067	109993	455033	73560.3
mws0473	C5H8O4	2-Methylsuccinic acid	Organic acids	1.62217e+06	137051	1926500	93220.3	1508400	112998	1.84617e+06	131998
Lmbn001288	C5H8O4	(S)-2-hydroxy-2-methyl-3-oxobutanoic acid	Organic acids	154360	15872.5	182517	8245.49	144320	13655.1	179577	13089
Lmgn000160	C4H8N2O3	3-Ureidopropionic Acid	Organic acids	1768.01	576.191	11426.3	10017.5	1352.34	300.087	1426	603.689
mws0972	C6H12O3	6-Hydroxyhexanoic acid	Organic acids	37419.7	2282.55	34083.7	2775.56	45441	2469.24	46824	4677.5
Lmbn000198	C4H6O5	3-Dehydro-L-Threonic Acid*	Organic acids	18266000	549473	13139000	758154	1.55773e+07	551448	1.36553e+07	636688
mws0275	C4H6O5	L-(-)-Malic acid*	Organic acids	4108000	147972	2.94057e+06	270728	3536000	114360	2.99577e+06	92942.9
Zmgn000503	C5H10O4	2,3-Dihydroxy-3-Methylbutanoic Acid	Organic acids	5455700	99968.5	3.58083e+06	425510	4.50753e+06	199937	4036300	156171
pme3207	C6H6O4	Muconic acid	Organic acids	619250	153113	1.58738e+06	1.18587e+06	1.38837e+06	167766	388327	53929.9
pme0295	C6H11NO3	4-Acetamidobutyric acid	Organic acids	201093	21188.9	154177	24194.9	145267	16725.1	137744	22000.1
mws0567	C5H11N3O2	4-Guanidinobutyric acid	Organic acids	195583	44975.3	161080	20360.1	148457	18295.7	181653	44417.8
pme2380	C5H6O5	α-Ketoglutaric acid	Organic acids	2.88153e+06	137135	4.23463e+06	57021.5	2.60483e+06	42009.9	4.18543e+06	357016
Lmgn000224	C5H6O5	(S)-2-methyl-3-oxosuccinic acid	Organic acids	466320	54239.9	687293	30267.7	431730	16496	640657	47468.6
mws0208	C6H10O4	Adipic Acid*	Organic acids	157267	26504.3	139364	43676.2	90095	12998.9	57527.3	12917.1
mws0924	C6H10O4	2-Methylglutaric acid*	Organic acids	167570	24375	123589	31396.4	85580.7	12664.8	50702	10115.1
Lmbn000216	C5H8O5	(2R,3S)-3-methylmalic acid	Organic acids	163730	19725.8	192127	5740.98	205813	13312.2	206247	16214
mws0262	C4H6O6	L-Tartaric acid	Organic acids	122664	12172.5	152730	19896.7	116867	14326.2	172700	36938.6
pmb3099	C4H11O4P	Diethyl phosphate	Organic acids	212130	17917.7	377713	54761	302527	14668.3	467380	15040.4
Lmbn001467	C7H13NO3	5-Acetamidopentanoic Acid	Organic acids	102137	1974.5	115860	5625.81	100614	4328.32	109440	6020.97
pme2589	C6H8O5	2-Oxoadipic acid	Organic acids	51976	9316.08	56681	10770.4	50317.3	8307.71	85672	26644.8
Zmjn001813	C7H12O4	Pimelic acid	Organic acids	9116.17	1041.8	47112	41845.7	9438.2	2249.84	9288.2	1553.61
Lmbn002072	C7H12O4	2-Propylsuccinic acid	Organic acids	9011.43	667.582	47081.1	40198.8	8152.33	411.462	6471.13	994.669
pme2761	C5H6O6	4-Hydroxy-2-oxoglutaric acid	Organic acids	66462.7	9775.08	60809.7	5626.18	48804.3	3948.75	61354.7	4922.48
Lmmn001643	C9H8O3	2-Hydroxycinnamic acid	Organic acids	193290	13153.3	213830	34718.1	194657	17835.3	211243	22077.9
mws0344	C5H10O6	D-Xylonic acid	Organic acids	1845300	70607.4	1.73013e+06	66290.2	1.68463e+06	50463.1	2.13047e+06	174167
mws2125	C3H5O6P	Phosphoenolpyruvate	Organic acids	1321700	196942	1476100	56030.5	1.1728e+06	128778	2515600	295352
Xmbp001692	C7H6O5	2,4,6-Trihydroxybenzoic acid	Organic acids	26561.3	2654.04	18854.3	4943.8	7678.3	1219.46	9	0
ML10176345	C7H8O5	3-Dehydroshikimic acid	Organic acids	29452.3	5897.96	63891.3	13727	31115.3	2069.63	82891.3	3558.82
Lmbn003524	C9H16O3	9-Oxononanoic acid	Organic acids	13016.7	241.609	13163.2	1844.05	12935.6	1617.48	10935.2	1567.35
pme3009	C6H6O6	Trans-Citridic acid*	Organic acids	1330900	265957	1.53307e+06	109459	1.66567e+06	90248.5	1.32067e+06	104056
pme2550	C6H6O6	Cis-Aconitic acid*	Organic acids	24293.3	2485.93	26807	2247.71	43538.3	6037.89	35881	4778.34
Lmgn002091	C7H10O5	2-Methyl-3-oxoadipic acid	Organic acids	27078.7	7751.85	77131	41387.7	26907.9	23799.1	20190.3	5987.42
Lmgn002184	C7H10O5	2-Oxoheptanedionic acid	Organic acids	25423.7	6622.95	86236.3	34694.4	28958.3	28949.3	22274	4399.35
mws0154	C7H10O5	Shikimic acid	Organic acids	65691.7	3482.2	69407	3646.4	100818	3938.07	85354.7	4007.27
Lmgn002555	C8H14O4	2-Propylglutaric acid	Organic acids	419613	15586.2	489610	17213.1	1.45367e+06	101471	400520	74121.8
mws0242	C8H14O4	Suberic Acid	Organic acids	51602.7	7383.82	48330.3	8270.03	93828	10011.2	47568.7	2860.18
Zmgn001448	C7H12O5	2-Propylmalic Acid	Organic acids	107820	10990.9	46095	1576.37	86605	7986.94	42358.3	6565.84
mws0237	C9H16O4	Anchoic Acid	Organic acids	999760	179186	786303	73328.5	1.40913e+06	466739	613270	72339.9
mws0281	C6H8O7	Citric Acid	Organic acids	1.09213e+07	263268	1.41053e+07	722201	1.06047e+07	196591	15971000	1.16059e+06
mws0277	C7H12O6	Quinic Acid	Organic acids	7076900	227273	9.81477e+06	636889	8.06823e+06	279662	11401000	266808
mws1189	C6H10O7	D-Galacturonic acid*	Organic acids	236147	9382.34	372787	30140.4	280383	26122.2	416797	27336.7
pmb2640	C12H24O2	Lauric acid	Organic acids	13447.7	501.32	12976	2119.71	11994.7	581.505	9419.23	487.328
Zmtn001464	C10H7NO4	4,8-Dihydroxyquinoline-2-carboxylic acid	Organic acids	1690600	44018.3	1.84993e+06	63512.6	1.89967e+06	72945.8	1.26013e+06	44925.2
pme0220	C13H20O3	Methyl jasmonate	Organic acids	5207.83	421.475	7495.37	2195.54	4439.33	654.751	6895.37	293.107
mws0474	C12H22O4	Dodecanedioic aicd	Organic acids	1599.8	203.463	1337.37	433.203	1503.77	141.037	999.8	158.035
Lmtn004049	C15H20O4	Abscisic acid	Organic acids	17044	524.292	10441.4	559.862	17954.7	884.573	14869	1870.05
Lmmn003323	C16H32O3	2-Hydroxyhexadecanoic acid	Organic acids	242130	40410	226447	13376.5	204660	21835	161967	3478.42
pmb2657	C10H18N4O6	Argininosuccinic acid	Organic acids	136615	18677	447847	9615.44	182263	2668.14	444123	58137.7
Zmyn000268	C3H6O3	2,3-Dihydroxypropanal	Others	22794.3	8005.39	11102.9	1421.54	20473.3	3138.21	11368.6	2555.81
pma0134	C4H8O4	D-(-)-Threose	Others	70136	4833.62	77872.3	331.526	62367.3	7511.6	54747	7368.58
mws0133	C6H6N2O	Nicotinamide	Others	551723	27681.5	684567	74460	428410	11827.6	602070	14549.4
pme0490	C6H5NO2	Nicotinic acid	Others	65034.7	3669.39	244400	119303	65949.7	3252.29	171077	4988.96
mws0889	C4H8O5	D-Threonic Acid	Others	882727	104819	819337	93833.4	758780	54898.6	723400	63541.9
mws1499	C5H10O5	D-(-)-Arabinose	Others	89372.7	12620.9	107617	13058.8	63579.7	7371.88	127011	26283.7
mws0437	C5H12O5	D-Arabitol*	Others	43297.7	4009.04	44206.7	1049.76	43691.3	9048.79	54720.7	5765.26
mws0213	C5H12O5	Ribitol*	Others	26071	6556.9	20582.3	3727.49	34324.3	4565.19	17563.1	4104.41
pme0513	C5H12O5	Xylitol	Others	72141.3	7130.55	72542	6601.49	49219.3	12561.8	86606.7	5436.24
Zmjp000624	C8H9NO3	Pyridoxal	Others	43970.7	4082.67	43326.3	2320.63	49503.7	4676.8	47650.3	5938.87
pme1383	C8H11NO3	Pyridoxine	Others	64793	2725.09	79248.3	8113.15	77361	7238.91	106986	3494.81
Zmzn000078	C3H7O6P	Dihydroxyacetone phosphate	Others	32545.7	2043.23	31985.3	1070.67	37299.3	3071.34	48425	10608.5
Hmfn00531	C6H8O6	L-Ascorbic acid	Others	1.57117e+07	188303	17093000	541613	11943000	727851	15096000	594749
mws4175	C6H8O6	D-Glucurono-6,3-lactone	Others	607153	48864.5	698313	75740.5	420463	26754.2	595193	76965.6
pmb0786	C6H13NO5	D-Glucosamine	Others	563190	31809.1	512833	34567.9	662803	33987.1	847480	73533.1
mws4170	C6H12O6	D-Glucose*	Others	578670	116361	1065900	14554.8	1048430	41139	1.47933e+06	206025
mws1164	C6H12O6	D-Fructose*	Others	469063	80519.3	842327	43546.4	885780	20573.5	1.22158e+06	135023
mws0214	C6H14O6	D-Sorbitol	Others	66796.7	9952.58	93786	16095.4	87394.3	9177.58	70843.3	10724.1
pme2237	C6H14O6	Dulcitol*	Others	182373	28324.1	212277	40845.3	226153	10728.7	210467	20095.7
mws1155	C6H14O6	Mannitol*	Others	49053.7	8104.3	67049	16979.4	63904	3545.05	52069	4895.15
pme2596	C8H9NO4	4-Pyridoxic acid	Others	34197.7	1165.76	23407.3	1773.72	20190.3	2532.51	15919.7	1091.92
Zmgn000447	C3H7O7P	3-Phospho-D-glyceric acid	Others	2890600	301883	5.46797e+06	2.15228e+06	2639500	119099	4.77187e+06	595362
pme3705	C6H10O7	D-Glucoronic acid*	Others	255597	15976.7	356130	31450.4	287773	5635.24	409640	11409.7
pme0534	C6H12O7	Gluconic acid	Others	582810	16846.7	649113	43419.4	575887	28711.5	993063	103181
pme1261	C9H19NO4	D-Panthenol	Others	4513.43	1579.81	1776.27	367.476	3656.63	507.085	1733.13	657.919
Zmpn000199	C6H10O8	D-Galactaric acid*	Others	26732.3	5412.38	38712.3	7105.36	21891.7	981.325	52401	5698.02
Zmyn000108	C6H10O8	D-Saccharic acid*	Others	19009.7	1582.99	29596	3678.63	28390	3129.53	52085.7	3732.49
mws1337	C9H17NO5	D-Pantothenic Acid	Others	711280	69657.8	920473	14391.4	710097	2344.05	889333	31247
pme2755	C8H15NO6	N-Acetyl-D-glucosamine	Others	195130	21752.5	188103	21440.3	189660	10276.4	243900	22795
pma6455	C5H11O8P	Ribulose-5-phosphate	Others	42647	7450.41	63263.3	23633.4	47933.7	27630.9	67703	19464.5
pma3101	C11H14NO6+	Nicotinate D-ribonucleoside	Others	4.76077e+06	185805	4374400	287870	4351900	217455	5.88837e+06	749759
mws0866	C6H13O9P	D-Glucose 6-phosphate*	Others	987857	5555.1	991167	72046.8	1.22263e+06	82873.9	1.54147e+06	143415
mws1090	C6H13O9P	Glucose-1-phosphate*	Others	1.04485e+06	39202.9	1.03024e+06	124641	1234500	59475.7	1.53967e+06	175115
pme3313	C6H13O9P	D-Fructose 6-phosphate*	Others	462390	13877.9	551147	58392.2	555057	19515.4	806530	73627.9
pmb3081	C6H11PO11	Glucarate O-Phosphoric acid	Others	2.86367e+06	873813	4158300	811533	1.88953e+06	418038	2.67277e+06	286957
pme2816	C20H28O2	4-Oxoretinol	Others	3840.93	1046.85	3484.13	630.315	4397.73	366.478	4661.13	213.476
pmb0789	C14H21NO8	Pyridoxine-5'-O-glucoside	Others	242317	12159.5	345460	22714	314393	14788	423157	22841.7
Zmyn000083	C6H14O12P2	D-Glucose 1,6-bisphosphate	Others	3867.7	332.267	3602.67	655.329	6330.43	1374.91	6656.77	878.537
pme3311	C6H14O12P2	D-Fructose-1,6-biphosphate	Others	18947.7	4142.87	16882.3	3739.14	13090.7	382.339	13547.7	3101.78
mws1333	C12H22O11	Melibiose	Others	1.05636e+06	119315	910340	54798.4	1.02352e+06	74030.9	1.07843e+06	72139.6
pme0519	C12H22O11	D-(+)-Sucrose*	Others	3742400	87594.2	3.12053e+06	124241	3798200	97836.7	3.79127e+06	212495
mws5038	C12H22O11	Isomaltulose	Others	1.70183e+06	219246	1701000	152483	1821400	274804	1.95867e+06	66175.7
mws0264	C12H22O11	D-(+)-Trehalose*	Others	845263	98931.9	814380	40707.7	974980	61945.1	959417	40767.2
pmb0801	C14H19NO9	4-Pyridoxic acid-O-glucoside	Others	1854100	143549	1965700	63000.4	1.58947e+06	123552	1.32647e+06	157136
mws0232	C17H20N4O6	Riboflavin	Others	359613	38513.4	314663	12281	328517	7549.35	354757	27143.4
pme1014	C31H40O2	Menaquinone (Vitamin K2)	Others	61197	6007.01	72358.3	13190.7	70494.3	4141.59	53477.7	4381.52
pmb2653	C24H42O20	D(+)-Melezitose O-rhamnoside	Others	8155.6	2097.54	14651	1646.29	14792.3	1735.63	11280	1986.37
Lmgn002679	C6H6O	Phenol	Phenolic acids	68399.3	2056.36	54529.7	8165.54	82656.7	15175.2	59222	3872.91
mws1358	C6H6O2	Pyrocatechol	Phenolic acids	1678700	160168	2.08013e+06	94573.7	2.31387e+06	87988.3	2480600	321560
Lmbn001930	C7H6O2	2-Hydroxybenzaldehyde (Salicylaldehyde)*	Phenolic acids	16629	2386.18	12019.6	1901.06	16314.7	850.28	16535.7	2401.8
mws0628	C7H6O2	4-Hydroxybenzaldehyde*	Phenolic acids	1187900	89414.8	1.23869e+06	147524	1.28607e+06	43744.2	1340400	87695.9
mws0566	C7H8O2	4-Methylcatechol	Phenolic acids	15706	1467.89	14823.7	2127.18	10142	628.623	6821.77	746.163
NK10264324	C6H6O3	1,3,5-Benzenetriol	Phenolic acids	100030	9649.61	82708.7	21231	106768	32275.8	77297.3	20431.9
Zmyn002919	C8H8O2	2-Methylbenzoic acid	Phenolic acids	1878.47	35.6502	1988.57	229.208	2486.03	229.369	2895.1	598.403
Hmbn002174	C8H8O2	4-Hydroxyacetophenone	Phenolic acids	7725.5	575.886	7875.87	2395.83	5491.7	807.368	5564.3	575.349
mws1336	C7H7NO2	4-Aminobenzoic acid	Phenolic acids	155213	6178.23	57661.7	7929.57	36246.7	3246	45274	1999.69
Lmbn001981	C7H6O3	2,5-Dihydroxybenzaldehyde	Phenolic acids	343557	18411.4	483593	173927	343167	45850.8	393907	32840.7
Lmgn001670	C7H6O3	Salicylic acid	Phenolic acids	93974.3	8175.12	87793.3	13629.7	80399	14529.7	84036.3	10654.8
mws2368	C8H10O2	Tyrosol	Phenolic acids	8924.37	924.791	9305.63	1994.73	10339.7	464.629	9487.67	770.372
Zmzn002575	C6H5NO3	2-Nitrophenol	Phenolic acids	1.85997e+06	212170	1.79963e+06	323213	2.18783e+06	395015	2351800	457148
pmp001285	C8H4O3	Phthalic anhydride	Phenolic acids	383597	19104.1	462087	76587.9	389357	12823.2	425603	7184.53
mws1024	C9H8O2	p-Coumaraldehyde	Phenolic acids	5995.33	1256.48	6494.77	1221.51	7628.93	960.657	6940.7	2032.08
mws2213	C9H8O2	Cinnamic acid	Phenolic acids	2911.4	500.82	2351.17	168.611	3804.73	359.578	3337.83	358.744
mws0921	C9H10O2	p-Coumaryl alcohol	Phenolic acids	78373.3	12990.8	76680.3	16658.4	81028.7	23076.9	77481.7	19607.5
mws0458	C8H8O3	Vanillin	Phenolic acids	3.10573e+06	261563	3037900	367643	2809600	86284.8	2.93077e+06	237294
mws0183	C7H6O4	3,4-Dihydroxybenzoic acid (Protocatechuic acid)	Phenolic acids	70024	2175.12	89897.3	8883.81	84576.3	2874.25	121027	4554.27
MA10040889	C6H5NO4	4-Nitrocatechol	Phenolic acids	79289	8206.18	39630.3	6012.35	55487	9718.28	59579	7945.77
pmf0440	C10H10O2	4-MethoxycinnaMaldehyde	Phenolic acids	35670	1812.73	38195.3	2151.82	38334	3250.19	36231	1318.29
pme1439	C9H8O3	p-Coumaric acid	Phenolic acids	66629.7	13663.7	61494.3	11209.9	59271.3	8060.89	62048.3	12140.2
pmb0142	C9H8O3	Caffeic aldehyde	Phenolic acids	199893	28485.9	240667	26672.2	219657	4707.46	231897	17940.4
pme0281	C8H6O4	Terephthalic acid	Phenolic acids	742470	26790.8	804640	28910.9	722137	62439.3	806590	35434.2
pme3381	C9H10O3	3-Hydroxyphenylacetic Acid Methyl Ester	Phenolic acids	12148	627.153	5326.13	1334.05	15927	2626.9	5789	793.545
NK10253223	C8H9NO3	2-Amino-3-methoxybenzoic acid	Phenolic acids	43034.7	4423.88	41182.7	3953.49	39889.3	2318.87	44384	4185.81
Hmbp001276	C8H8O4	Gallacetophenone	Phenolic acids	889683	39173.6	443270	72231	497100	7359.57	373337	54696.5
pme2598	C8H8O4	3,4-Dihydroxybenzeneacetic acid	Phenolic acids	114259	21538.8	149699	38600.1	152937	50275.4	194442	79817.4
mws0028	C8H8O4	Vanillic acid	Phenolic acids	221007	14554.3	169070	5686.84	202263	21481.6	168513	10585.6
mws0009	C10H10O3	Coniferaldehyde	Phenolic acids	22668	3704.86	22407.7	2982	18886.3	2807.56	19148.7	4121.96
mws2212	C9H8O4	Caffeic acid	Phenolic acids	148393	18791.9	119860	14862.2	114324	13891.4	121473	10881.3
mws0093	C10H12O3	Coniferyl alcohol	Phenolic acids	668433	122671	647610	146736	491377	140638	505477	135025
mws1350	C9H10O4	Syringaldehyde; 4-Hydroxy-3,5-Dimethoxybenzaldehyde	Phenolic acids	163403	14158.1	158070	20342.9	158933	6799.34	169967	16883.9
Hmtn001288	C9H10O4	Methyl 2,4-dihydroxyphenylacetate	Phenolic acids	26717	1023.65	37567.3	3545.83	50643.7	1294.86	35901	1184.16
MA10002917	C6H4N2O5	2,4-Dinitrophenol	Phenolic acids	172133	6969.47	197917	12840	150583	9814.09	219760	14298.9
Xmgn006542	C10H10O4	Dimethyl Phthalate*	Phenolic acids	8917.8	801.766	5777.57	619.288	5709.7	548.15	5629.43	870.044
mws0014	C10H10O4	Ferulic acid*	Phenolic acids	1.05003e+06	70754.6	985433	172092	759810	94867.1	873610	69559.9
mws0027	C9H10O5	Syringic acid	Phenolic acids	87895.3	5861.35	77823.7	4862.43	84978	3624.75	80226.7	5056.68
pmb2620	C11H12O4	3,4-Dimethoxycinnamic acid	Phenolic acids	118123	5467.33	78979.7	8715.93	53619.3	3470.12	45522.7	3174.4
pme3443	C11H12O4	Sinapinaldehyde	Phenolic acids	185880	39479.3	162253	18051.9	167637	29772.1	190473	32351.7
mws1212	C11H12O4	Methyl ferulate	Phenolic acids	49123.7	5031.79	28114	4821.63	20352.7	813.266	18298.7	3335.39
mws0853	C11H14O4	Sinapyl alcohol	Phenolic acids	75262.3	10146.6	69525.7	16532.6	52768.7	11393.6	56603.3	11658.8
mws4085	C11H12O5	Sinapic acid	Phenolic acids	385100	44632.9	296060	25835.2	163337	23847.2	138462	20350.9
Lmhn003240	C11H10O6	Benzoylmalic acid	Phenolic acids	7693.77	758.002	2.86647e+06	826459	7400.83	1285.01	11800.1	1836.3
pmn001669	C12H14O5	Methyl sinapate	Phenolic acids	202333	15378	126917	31386.3	50565.3	4017.59	48663	5118.48
pmn001320	C12H14O5	1-O-p-Cumaroylglycerol	Phenolic acids	20611.3	1472.94	23348.3	6279.6	26504.7	1038.62	23066	7735.09
pmp000086	C13H16O6	1-Feruloyl-sn-glycerol	Phenolic acids	53143.7	6342.4	51391	7581.21	23733.3	2943.72	9486.47	1547.97
pmn001687	C13H12O8	Cis-Coutaric acid	Phenolic acids	21946	2857.51	21257.7	3195.61	21578	1066.43	27915.3	6600.02
Zmhn001926	C13H16O8	1-O-Salicyl-D-glucose	Phenolic acids	7001900	554812	7.04563e+06	167315	4.71793e+06	306089	5454500	335198
pmn001367	C13H16O9	Protocatechuic acid-4-O-glucoside	Phenolic acids	16423000	150221	15471000	695723	1.01695e+07	873448	9.64287e+06	1.33575e+06
Zmhn002301	C15H18O8	p-Coumaric acid-4-O-glucoside	Phenolic acids	384910	20077.7	519037	60802.9	653950	34980.5	817310	126717
Lmtn002565	C14H18O9	1-O-Vanilloyl-D-Glucose	Phenolic acids	116140	5662.83	140020	1285.98	128470	2326.81	165633	13546.7
pmn001518	C13H16O10	1-O-Galloyl-D-glucose	Phenolic acids	4.17803e+06	728259	3.24277e+06	426855	2.15633e+06	177310	2470100	612474
Lmmn001294	C14H20O9	Koaburaside	Phenolic acids	746113	50589.5	796813	48185.9	668237	32485.2	965493	61733.6
Hmln002806	C16H16O8	5-O-Caffeoylshikimic acid	Phenolic acids	13130	1486.42	22046.7	8188.19	53061.7	7453.79	14956.7	1615.71
pmb3068	C16H18O8	1-O-p-Coumaroylquinic acid	Phenolic acids	12300.5	1377.39	13096	1946.46	12773.9	1587.82	12320.7	2131.73
pmn001420	C15H18O9	1-O-[(E)-Caffeoyl]-D-glucose	Phenolic acids	114164	14684.1	130641	28951.8	137403	18069.2	160080	10992.2
mws0906	C16H22O8	Coniferin	Phenolic acids	277450	22194.6	157830	18916.2	206080	5562.53	133383	10930.8
Zmln000899	C15H20O9	Syringaldehyde-4-O-glucoside*	Phenolic acids	238653	7797.23	217013	9719.77	220090	6673.85	321697	38281.6
Lmmn000774	C15H20O9	Dihydrocaffeoylglucose*	Phenolic acids	249897	10621.9	226317	16245.1	225547	15043.6	356413	40005.7
mws0178	C16H18O9	Chlorogenic acid*	Phenolic acids	44857.3	2715.54	63585	17090.4	109367	6191.86	54627.3	7667.96
pme1816	C16H18O9	Neochlorogenic acid(5-O-Caffeoylquinic acid)*	Phenolic acids	52839.3	4882.62	71494.3	16152	117733	9376.24	59061.3	8167.14
Zmhn002422	C16H20O9	1-O-Feruloyl-D-Glucose	Phenolic acids	1.52637e+06	48726.5	1475300	64446.7	1.79193e+06	46373.1	1.93477e+06	62226.5
pmb0752	C17H20O9	3-O-Feruloylquinic acid	Phenolic acids	4235300	218965	2811400	191025	3020500	22803.8	4.53113e+06	792145
pma3724	C17H20O9	1-O-Feruloylquinic acid	Phenolic acids	214997	837.483	145333	8799.29	186127	9955.54	212230	14785.5
mws0179	C17H20O9	Chlorogenic acid methyl ester	Phenolic acids	45054	1936.63	38533	2910.11	43704.3	2042.22	63867	10205.3
pmn001695	C16H20O10	Trihydroxycinnamoylquinic acid	Phenolic acids	511320	35163	524263	26886	608330	29140.2	567667	34045
HJN003	C17H22O10	1-O-Sinapoyl-D-glucose	Phenolic acids	3.49857e+06	365098	2.39547e+06	598484	1.27343e+06	88242.6	1.23209e+06	177959
Lmzn001582	C18H28O9	5'-Glucosyloxyjasmanic acid	Phenolic acids	578493	67966.6	407080	85672.6	252403	16775.9	209253	38635.5
pma0110	C18H22O10	4-O-Sinapoylquinic acid	Phenolic acids	31754	589.509	22916	1848.21	38420.3	1708.66	48269	7462.05
pmn001738	C17H24O11	Oleoside 11-methyl ester	Phenolic acids	163563	17680.9	149643	8526.46	254990	18568.3	193757	26770.5
pmn001319	C22H22O8	1-O-Feruloyl-3-O-p-Coumaroylglycerol	Phenolic acids	9270.03	1981.6	5018.53	1783.18	26483.3	5710.48	4588.87	1582.74
Cmzn005251	C21H22O10	6-O-Caffeoylarbutin	Phenolic acids	930740	71019.1	1.18327e+06	23519.2	1.49273e+06	78242.4	1.48303e+06	101696
pmp000091	C23H24O9	1,3-O-Diferuloylglycerol	Phenolic acids	432990	119010	303090	67532.3	864270	219021	289727	140501
pmb3072	C22H26O12	3-O-p-Coumaroylshikimic acid O-glucoside	Phenolic acids	43391.3	2747.82	43598.7	8155.74	47486	4727.87	70277	15437.3
pmn001526	C20H20O14	1,6-Di-O-Galloyl-D-Glucose	Phenolic acids	10753.6	1006.28	10091.4	683.475	10693	914.866	12164.7	211.468
pmb3064	C22H28O13	3-O-p-Coumaroylquinic acid O-glucoside	Phenolic acids	46785.7	9144.02	56579.3	13869	39700	4108.05	38079.3	7913.71
pmn001382	C25H24O12	Isochlorogenic acid A	Phenolic acids	18785.7	2571.42	21555	620.275	15712	1700.27	16172.7	1447.84
Hmbn002692	C22H30O14	6'-O-Feruloyl-D-sucrose	Phenolic acids	387207	35718.2	234467	3898.1	376340	34441.5	212570	17166.5
pmb2833	C23H30O14	3-O-Feruloylquinic acid glucoside	Phenolic acids	801360	43850.8	645317	52741.4	627593	27656.5	775967	110679
pmb0824	C25H28O13	Syringic acid-4-O-(6''-feruloyl)glucoside	Phenolic acids	17538.3	603.467	13067.7	1238.53	13247	1087.3	17738	1869.15
pmn001672	C23H32O15	Furanofructosyl-α-D-(3-mustard acyl)glucoside	Phenolic acids	979190	86833.1	694837	108788	131483	8762.63	235413	45895.3
pmb2936	C28H32O14	Disinapoyl glucoside	Phenolic acids	1.03525e+06	256599	961040	265453	600090	71731.1	829327	144067
pmb2819	C27H38O19	O-Caffeoyl maltotriose	Phenolic acids	2249.43	445.63	1705.14	354.025	2650.73	320.722	2615.07	83.8445
HJN102	C34H30O15	3,4,5-Tricaffeoylquinic acid	Phenolic acids	32078.7	5840.07	18848.3	884.795	48217.3	4484.9	10940.8	1777.59
Lmjn003562	C32H38O17	3,6'-Diferuloylsucrose	Phenolic acids	42793	5252.71	34853	1256.6	37852.7	4786.38	25251.3	1867.84
